# Supplementary material for: Remote sensing of salmonid spawning sites in freshwater ecosystems: The potential of low-cost UAV data
Source: PLOS journal article supplement (doi:10.1371/journal.pone.0290736), 2023-08-29
Supplement: S5 (10.1371/journal.pone.0290736.s005) [file journal.pone.0290736.s005]

**S5 Table. Accuracy assessment maximum likelihood lake Ellidavatn.** Results of accuracy assessment of the maximum likelihood classification algorithm in lake Ellidavatn before and after applying post-classification methods. Reported are producer's Accuracy (PA) and User's Accuracy (UA) by class.

| Class                 | Before post-classification methods |        | After post-classification methods |        |
|-----------------------|------------------------------------|--------|-----------------------------------|--------|
|                       | PA (%)                             | UA (%) | PA (%)                            | UA (%) |
| Spawning redds        | 91.79                              | 84.67  | 95.15                             | 87.06  |
| Vegetation            | 88.75                              | 83.24  | 91.31                             | 85.10  |
| Underwater rocks      | 75.47                              | 96.85  | 75.22                             | 99.46  |
| Aquatic vegetation    | 88.26                              | 91.76  | 90.68                             | 95.21  |
| Anthropogenic feature | 93.20                              | 91.97  | 95.88                             | 92.77  |
| Sediment              | 85.97                              | 75.70  | 87.65                             | 77.18  |
| Overall accuracy (%)  | 86.88                              |        | 88.89                             |        |
| Kappa coefficient     | 0.84                               |        | 0.87                              |        |
